# Supplementary material for: Polyoxometalate-doped electrospun nanofiber mats as active catalysts for the production of clean fuels under solvent-free systems
Source: Royal Society of Chemistry journal article supplement (doi:10.1039/d2se00723a), 2022-01-01
Supplement: d2se00723a1.pdf [file d2se00723a1.pdf]

## ELECTRONIC SUPPORTING INFORMATION

### Polyoxometalate-doped electrospun nanofibers mats as active catalysts for the production of clean fuels under solvent-free systems

Fátima M. Mirante,<sup>a</sup> Maryam Salimian,<sup>b</sup> Paula A.A.P. Marques,<sup>b</sup> Carlos M. Granadeiro,<sup>a,\*</sup> Salette S. Balula<sup>a,\*</sup>

<sup>a</sup>*LAQV-REQUIMTE, Departamento de Química e Bioquímica, Faculdade de Ciências, Universidade do Porto, 4169-007 Porto, Portugal*

<sup>b</sup>*Centre for Mechanical Technology and Automation (TEMA) & Department of Mechanics, University of Aveiro, 3810-193 Aveiro, Portugal*

\* corresponding authors. E-mail: [cgranadeiro@fc.up.pt](mailto:cgranadeiro@fc.up.pt); [sbalula@fc.up.pt](mailto:sbalula@fc.up.pt)

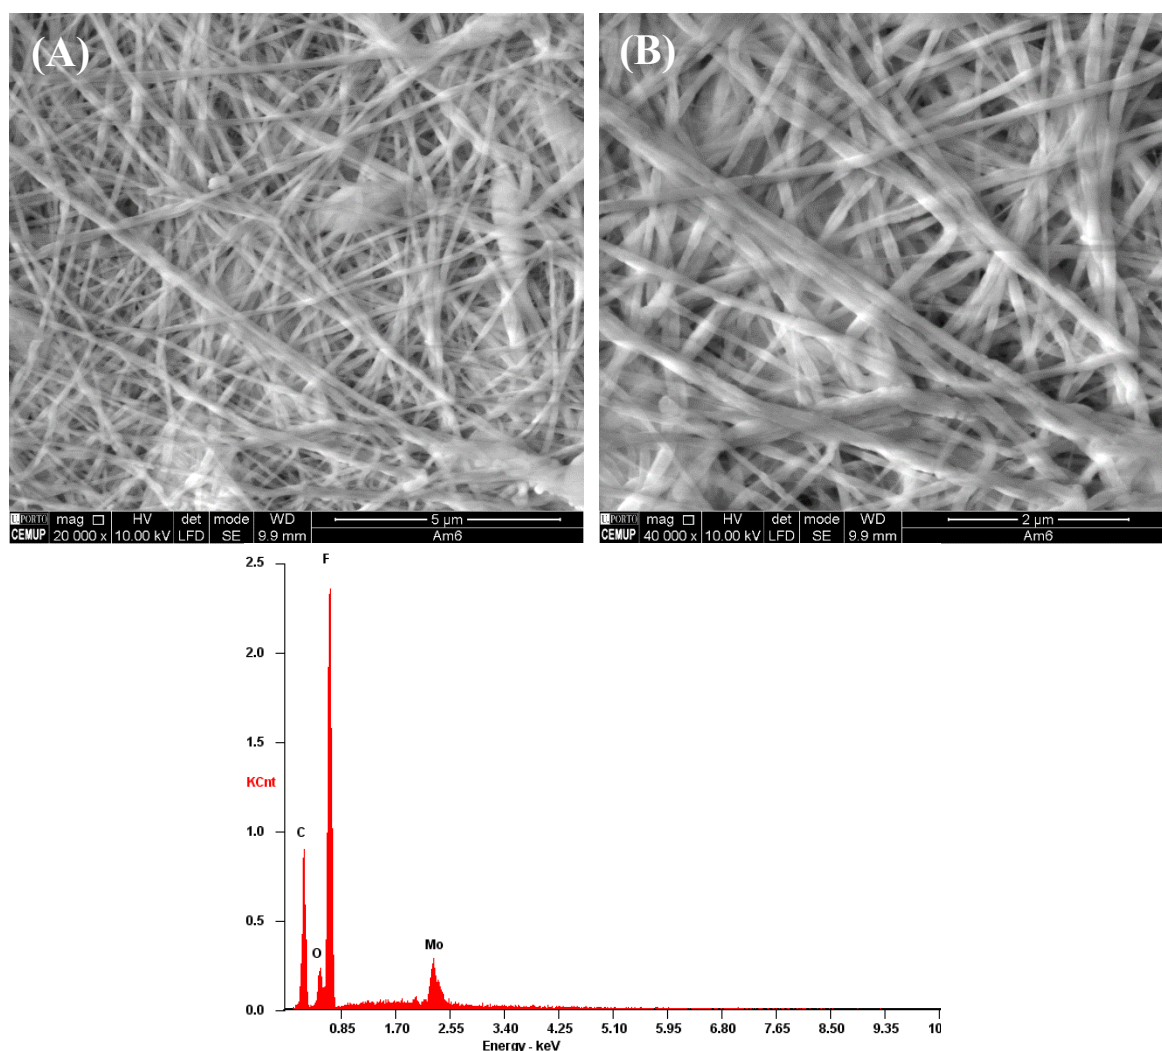

**Fig. S1** SEM micrographs of the 2.6PMo<sub>12</sub>@P(VDF-TrFE) nanofiber mat at (A) 20000x in SE mode, (B) 40000x in SE mode, and (C) EDS spectrum.

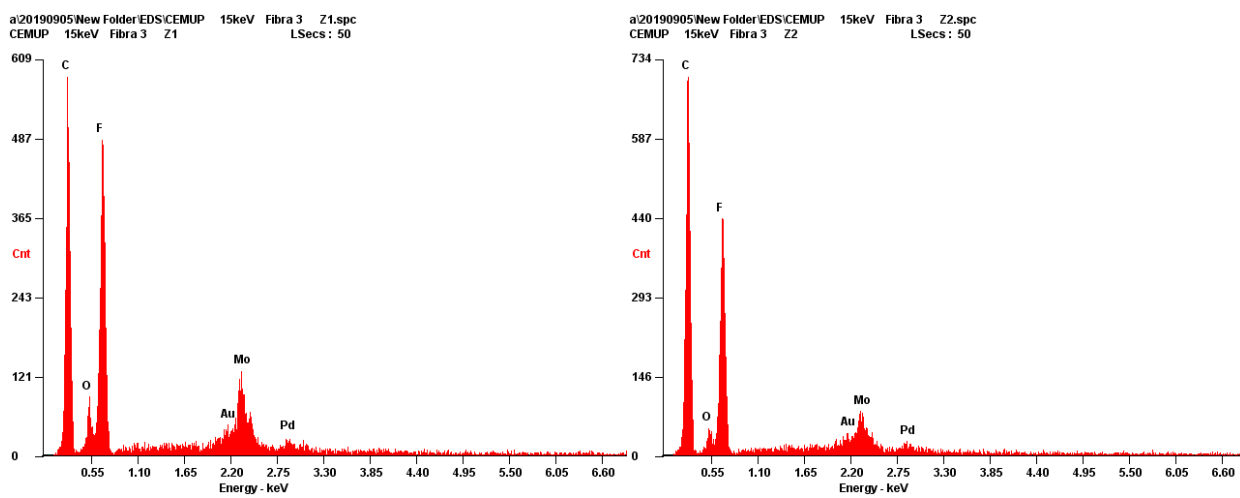

**Fig. S2** EDS spectra for Z1 (left) and Z2 (right) areas of  $\text{PMo}_{12}@P(\text{VDF-TrFE})$  nanofiber mat (Figure 2B).

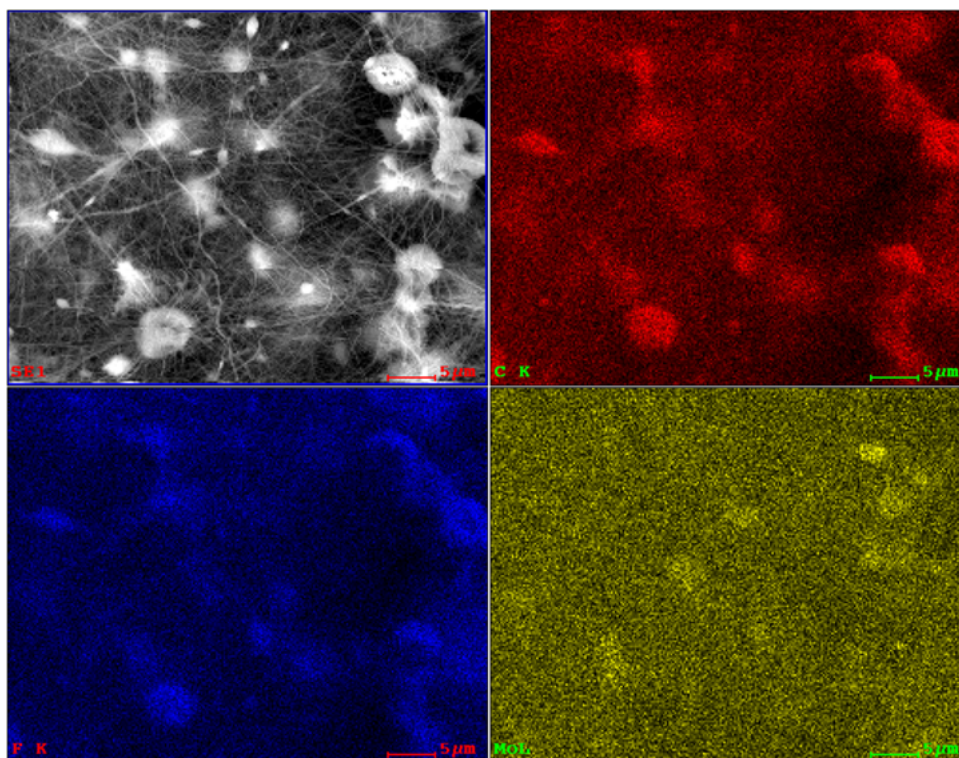

**Fig. S3** SEM image and EDS elemental mapping for the  $\text{PMo}_{12}@P(\text{VDF-TrFE})$  nanofiber mat.

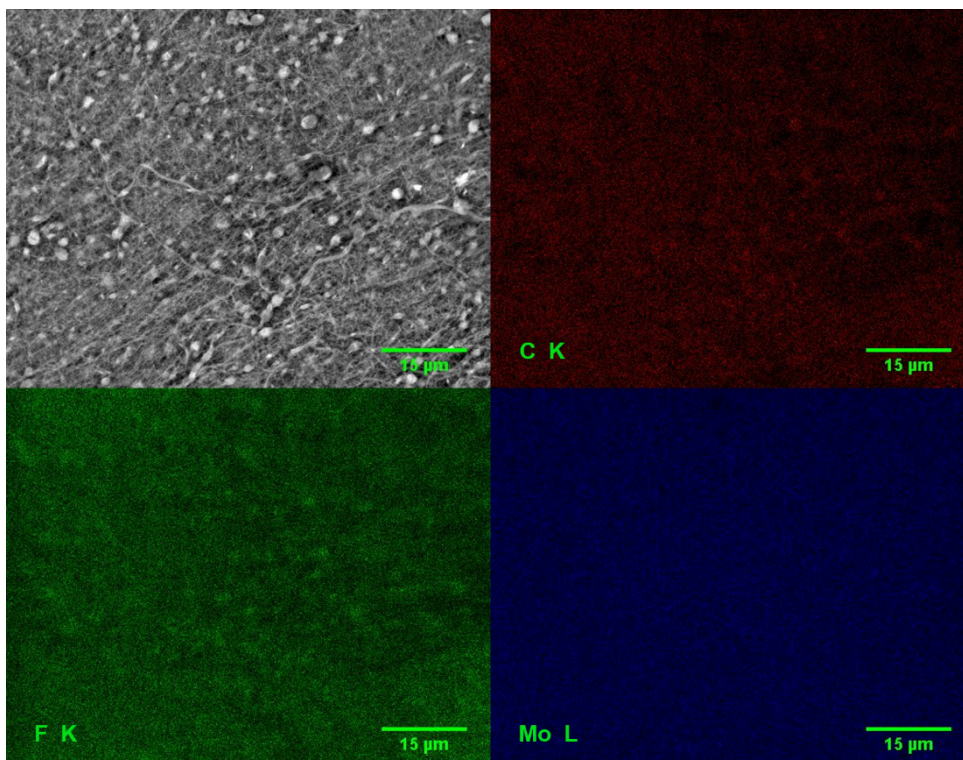

**Fig. S4** SEM image and EDS elemental mapping for the 2.6PMo<sub>12</sub>@P(VDF-TrFE) nanofiber mat.

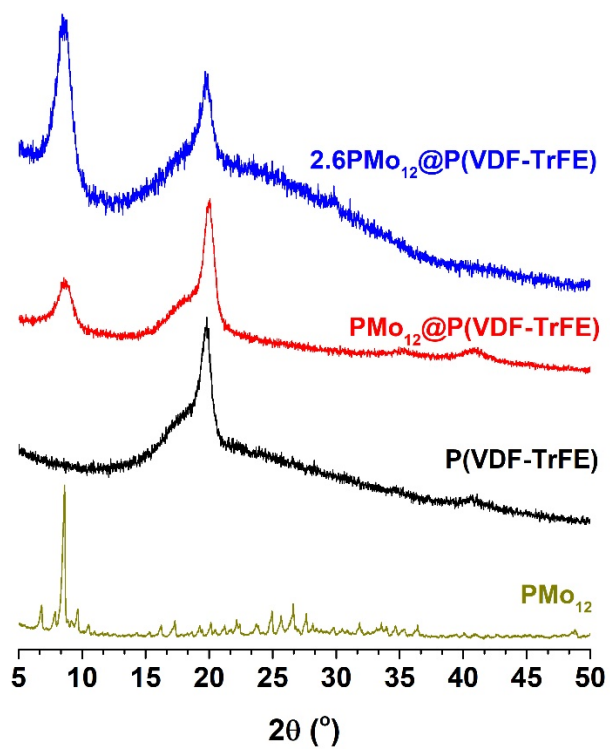

**Fig. S5** XRD patterns of PMo<sub>12</sub>, isolated P(VDF-TrFE), PMo<sub>12</sub>@P(VDF-TrFE) and 2.6PMo<sub>12</sub>@P(VDF-TrFE) nanofiber mats.

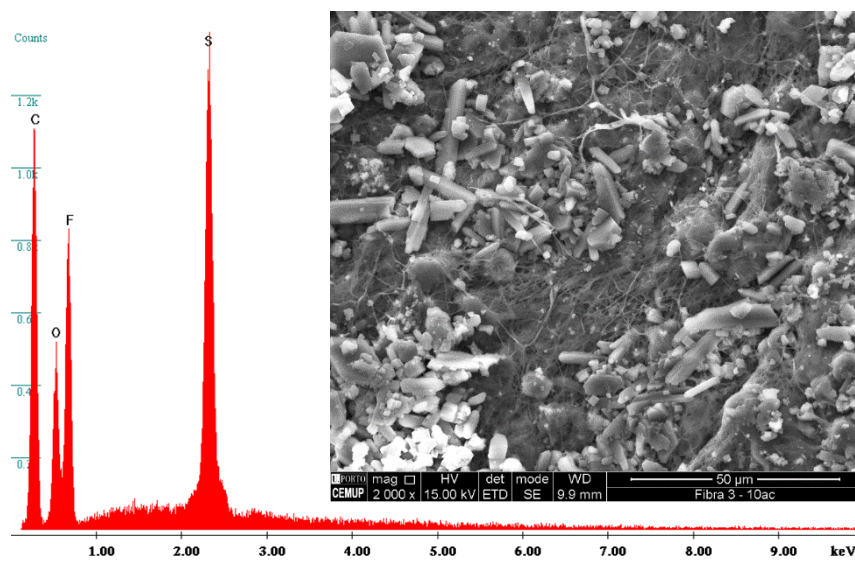

**Fig. S6** SEM image and EDS spectrum of the  $\text{PMo}_{12}@\text{P}(\text{VDF-TrFE})$  nanofiber mat after ten consecutive ODS cycles.

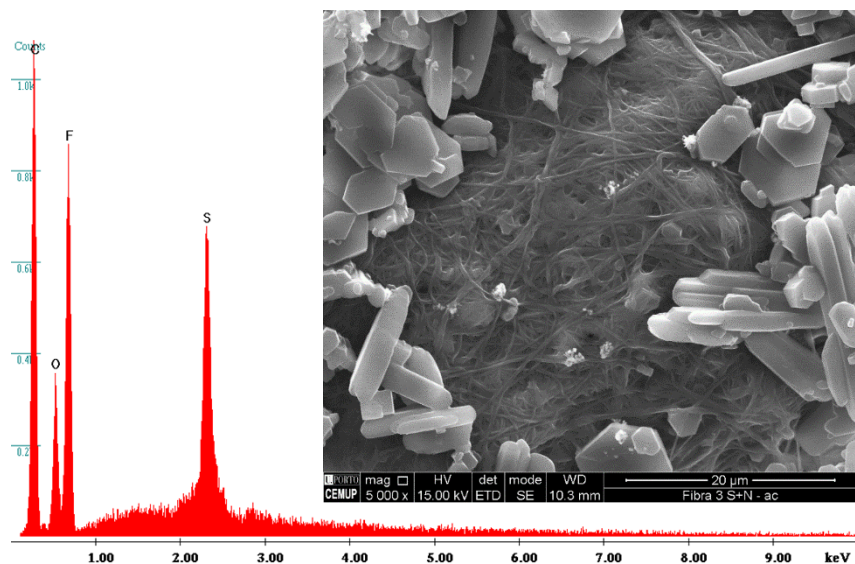

**Fig. S7** SEM image and EDS spectrum of the  $\text{PMo}_{12}@\text{P}(\text{VDF-TrFE})$  nanofiber mat after three consecutive ODS/ODN cycles.

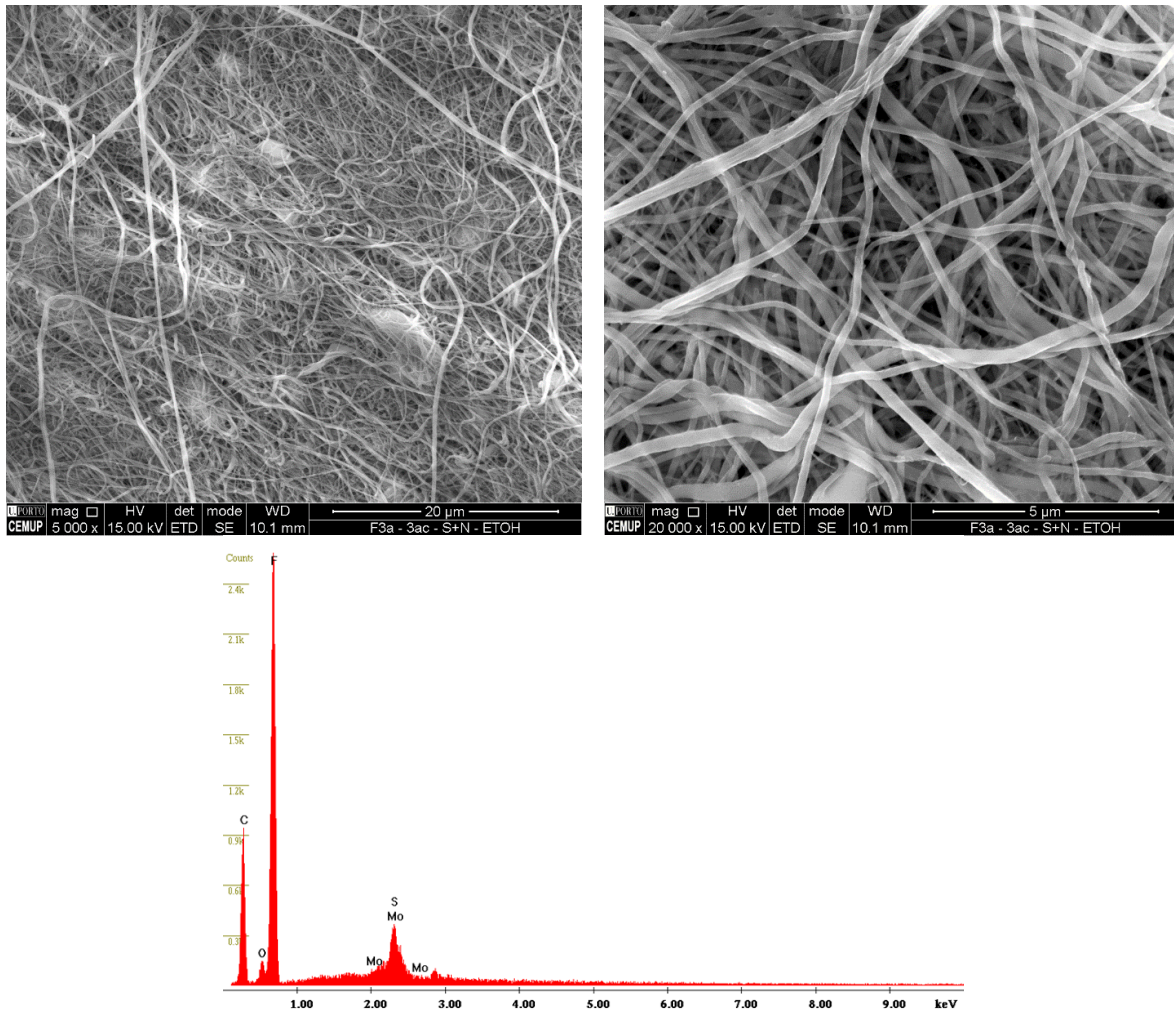

**Fig. S8** SEM micrographs of the  $\text{PMo}_{12}@\text{P}(\text{VDF-TrFE})$  nanofiber mat after three ODS/ODN cycles washed with ethanol at (A) 5000x, (B) 20000x in SE mode, and (C) EDS spectrum.

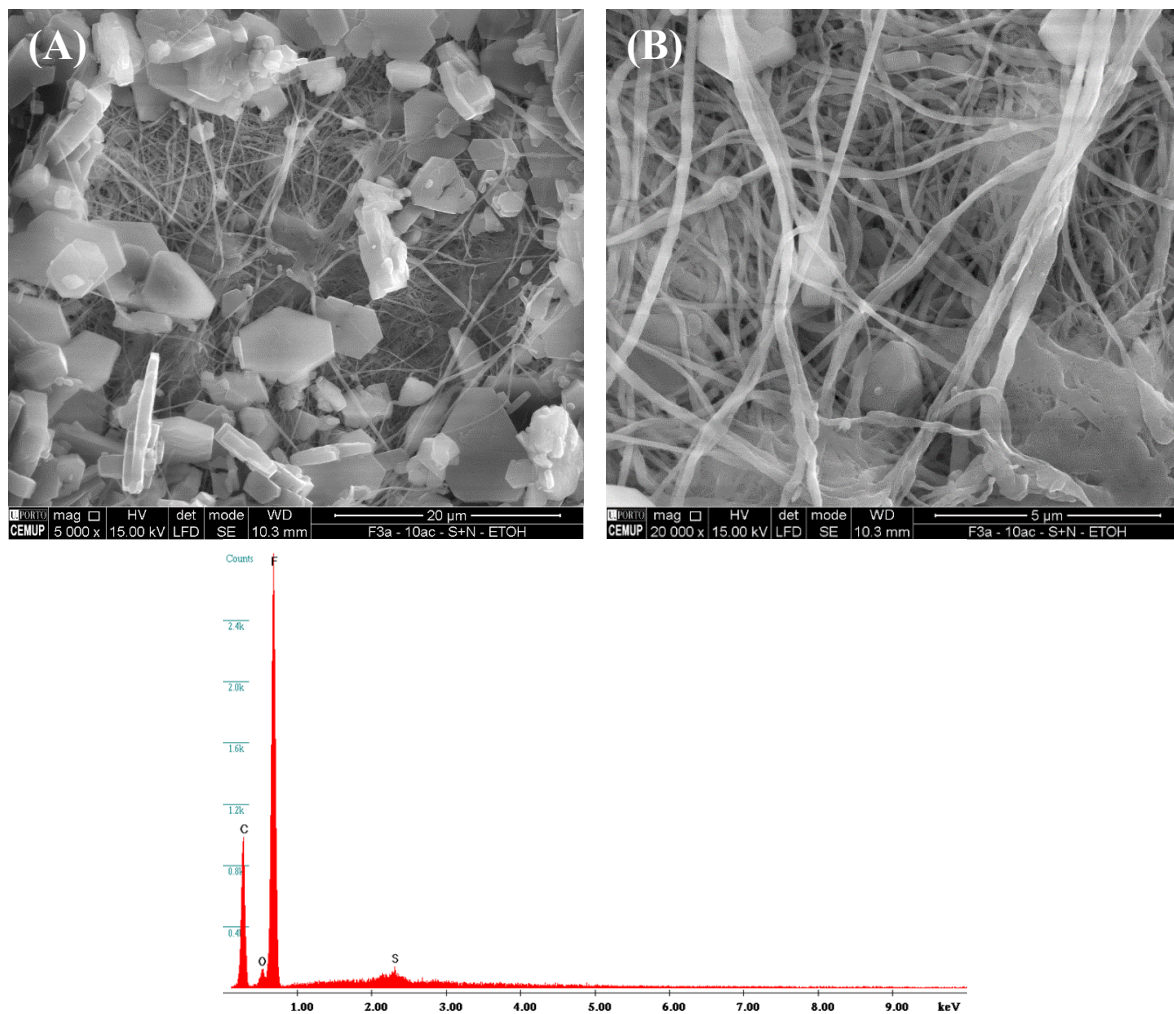

**Fig. S9** SEM micrographs of the PMo<sub>12</sub>@P(VDF-TrFE) nanofiber mat after ten ODS/ODN cycles washed with ethanol at (A) 5000x, (B) 20000x in SE mode, and (C) EDS spectrum.

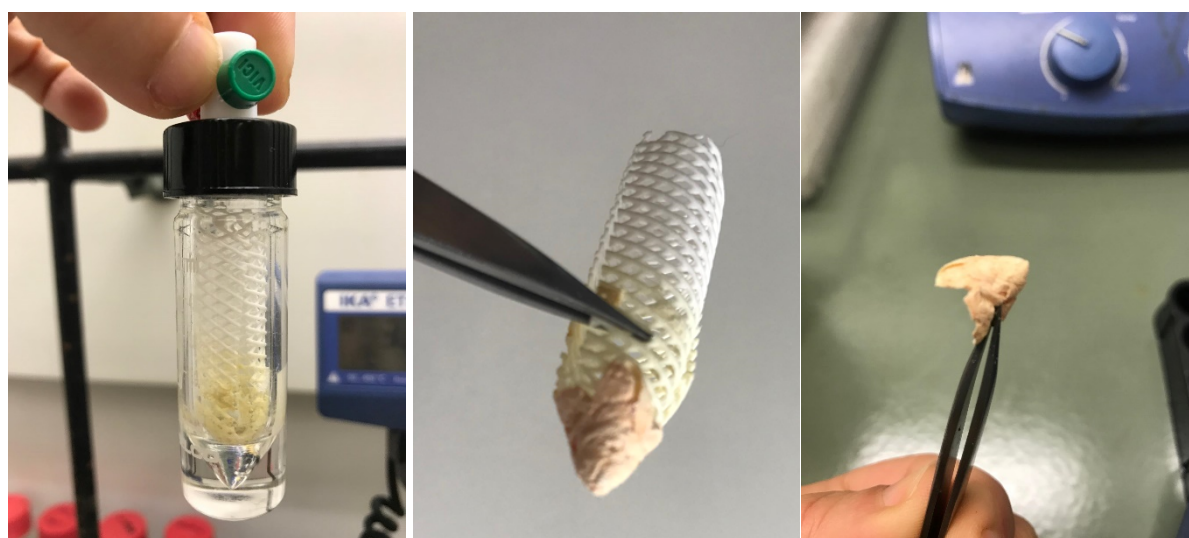

**Fig. S10** Digital photographs of the PMo<sub>12</sub>@P(VDF-TrFE) mat with a protective grid for ODS/ODN reactions.

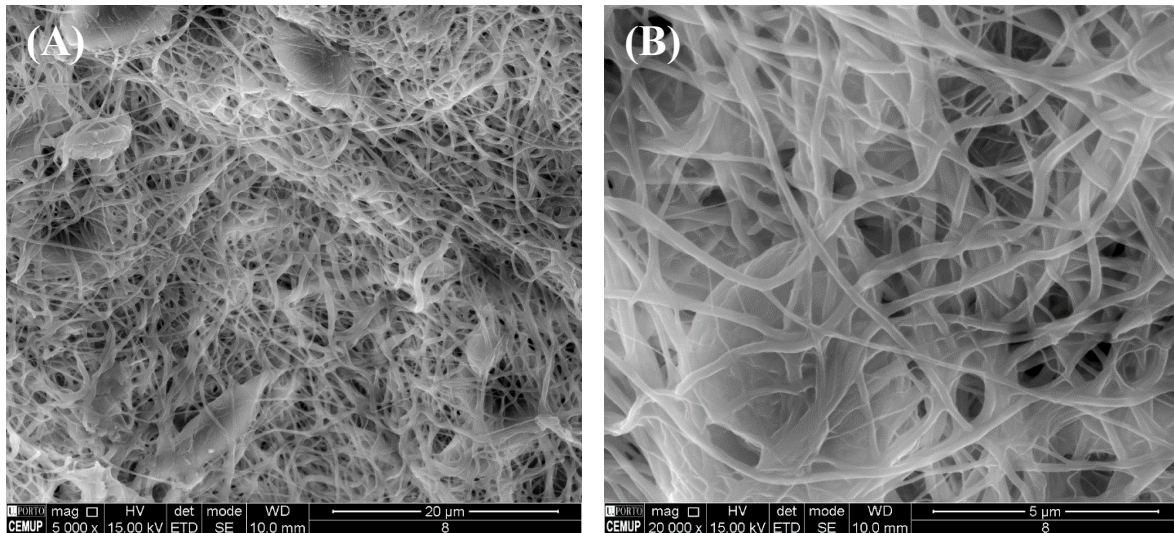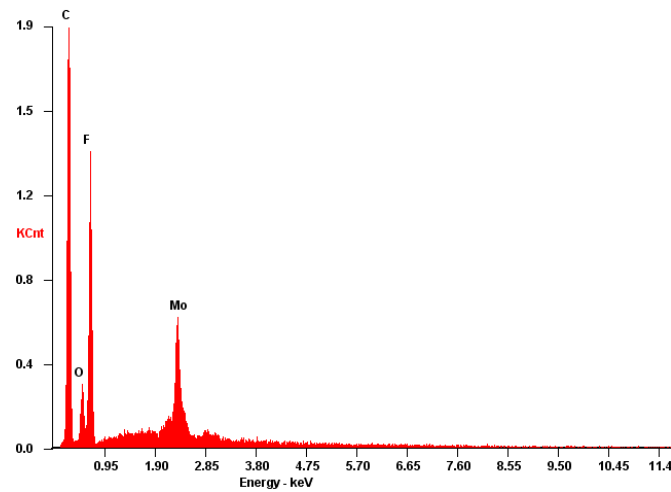

**Fig. S11** SEM micrographs of the  $\text{PMo}_{12}@\text{P}(\text{VDF-TrFE})$  nanofiber mat using protective grid after ten ODS/ODN cycles at (A) 5000x, (B) 20000x in SE mode, and (C) EDS spectrum.

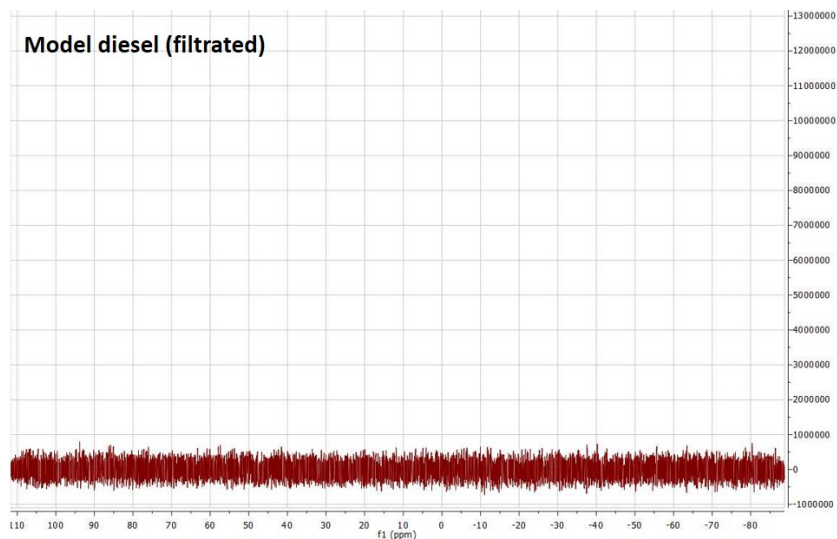

**Fig. S12**  $^{31}\text{P}$  NMR spectrum of the filtrated model diesel of the leaching test using the  $\text{PMo}_{12}@\text{P}(\text{VDF-TrFE})$  mat with grid.

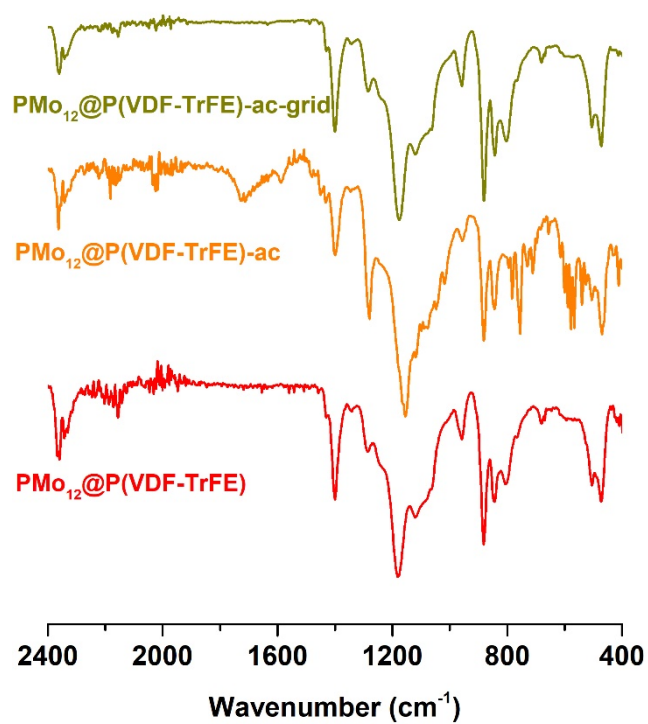

**Fig. S13** FT-IR/ATR spectra of the PMo<sub>12</sub>@P(VDF-TrFE) mat as-prepared, after catalytic use (ac) and after catalytic use with protective grid (ac-grid).
